# Supplementary material
Source: PubMed Central journal article supplement (PMC5457534)
Supplement: NIHMS863418-supplement-SuppInfo.pdf [file NIHMS863418-supplement-SuppInfo.pdf]

## SUPPORTING INFORMATION

### Materials and Methods

**General Consideration.** 1, 3-dimethyl-1*H*-imidazolium tetrafluoroborate (**1**),<sup>1</sup> and 1, 3-dimethyl-4-nitroimidazolium silver complex (**3**)<sup>2</sup> were synthesized according to the reported procedure. 1-Methylimidazole, boron trifluoride diethyl etherate (BF<sub>3</sub>-OEt<sub>2</sub>), methyl iodide (CH<sub>3</sub>I), 10% palladium supported carbon, and succinic anhydride were purchased from Alfar Aesar; 4-nitroimidazole was purchased from Tokyo Chemical Industry Co., Ltd; N, N-di-*iso*-propylethylamine (DIEA), and maleic anhydride were purchased from Sigma Aldrich; silver oxide was purchased from Strem chemicals; acetic anhydride was purchased from EM industries, Inc; sodium acetate was purchased from Mallinckrodt. All chemicals were used without further purification. Solvents were dried by passing through an alumina column (CH<sub>2</sub>Cl<sub>2</sub>), refluxing under N<sub>2</sub> over Na (Et<sub>2</sub>O and THF), refluxing under N<sub>2</sub> over CaH<sub>2</sub> (CH<sub>3</sub>CN). Electrospray mass spectra were acquired on a MDS Sciex API QStar Pulsar. NMR spectra were recorded on a Varian Unity Inova 400 NMR and an Inova 500B spectrometer at ambient temperature. Chemical shifts are given in ppm, and are referenced to residual <sup>1</sup>H and <sup>13</sup>C solvent signals as well as external BF<sub>3</sub>-Et<sub>2</sub>O (<sup>11</sup>B NMR and <sup>19</sup>F NMR).

### Preparation of 1, 3-dimethylimidazolium-2-trifluoroborate (**2**)

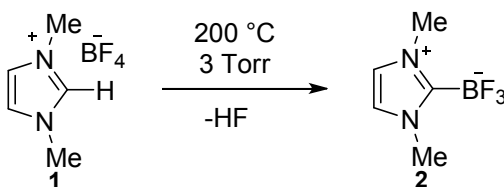

1, 3-Dimethyl-1*H*-imidazolium tetrafluoroborate (0.252 g, 1.37 mmol) was placed into a sublimation apparatus, connected *via* a liquid-N<sub>2</sub>-cooled trap to a high-vacuum line. The powder was heated by a heating mantle under reduced pressure to 200 °C at which point compound **2** started condensing on the cold finger. The sublimation was continued for 15 min. Compound **2** (0.196 g, 1.19 mmol) was obtained in a 87 % yield. <sup>1</sup>H NMR (499.4 MHz, CD<sub>3</sub>CN): δ 3.85 (s, 6H, -CH<sub>3</sub>), 7.11 (s, 2H, =CH). <sup>13</sup>C NMR (125.6 MHz, CD<sub>3</sub>CN): δ 35.93 (-CH<sub>3</sub>), 122.64 (=CH). <sup>11</sup>B NMR (128.2 MHz, CD<sub>3</sub>CN): δ 0.21 (q, *J*<sub>B-F</sub> = 37.0 Hz). <sup>19</sup>F NMR (282.2 MHz, CD<sub>3</sub>CN): δ -139.2 (q, *J*<sub>B-F</sub> = 37.0 Hz). HRMS (ESI<sup>+</sup>) calcd for [M-F]<sup>+</sup>: 145.0748, found: 145.0758.

### Preparation of 1, 3-dimethyl-4-nitroimidazolium-2-trifluoroborate (4)

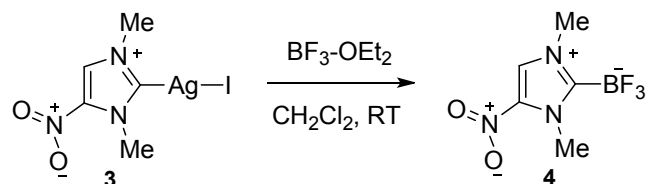

BF<sub>3</sub>-OEt<sub>2</sub> (0.34 mL, 2.75 mmol) was added to a suspension of **3** (0.691 g, 0.92 mmol) in CH<sub>2</sub>Cl<sub>2</sub> (15 mL) at room temperature. The suspension was stirred for 4 h and filtered. The filtrate was purified by flash chromatography using silica gel as a stationary phase and CH<sub>2</sub>Cl<sub>2</sub> as a mobile phase to remove an excess BF<sub>3</sub>-OEt<sub>2</sub> and an imidazolium salt impurity. The purified solution was dried *in vacuo* resulting **4** as a white powder (0.160 g) in a 83 % yield. <sup>1</sup>H NMR (499.4 MHz, CD<sub>3</sub>CN): δ 3.94 (s, 3H, -CH<sub>3</sub>), 4.16 (s, 3H, -CH<sub>3</sub>), 8.21 (s, 1H, =CH). <sup>13</sup>C NMR (125.6 MHz, CD<sub>3</sub>CN): δ 35.84 (CH<sub>3</sub>), 37.61 (CH<sub>3</sub>), 126.04 (=CH), 138.55 (=CNO<sub>2</sub>). <sup>11</sup>B NMR (128.2 MHz, CD<sub>3</sub>CN): δ 0.13 (q, J<sub>B-F</sub> = 33.5 Hz). <sup>19</sup>F NMR (469.9 MHz, CD<sub>3</sub>CN): δ -137.86 (q, J<sub>B-F</sub> = 33.5 Hz). HRMS (ESI<sup>-</sup>) calcd for [M-H]<sup>-</sup>: 208.0505, found: 208.0517.

### Preparation of 1, 3-dimethyl-4-aminoimidazolium-2-trifluoroborate (5)

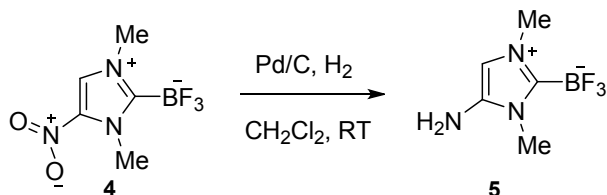

10% palladium on carbon (0.235 g, 0.221 mmol Pd) was added to a solution of **4** (0.461 g, 2.21 mmol) in CH<sub>2</sub>Cl<sub>2</sub> (20 mL). Hydrogen gas was bubbled through the solution for 30 min. The mixture was stirred under a hydrogen atmosphere overnight at room temperature. The solution was then filtered over celite and the solvent was removed under vacuum yielding **5** as a white powder (0.307 g) in a 78 % yield. <sup>1</sup>H NMR (499.4 MHz, CD<sub>3</sub>CN): δ 3.61 (s, 3H, -CH<sub>3</sub>), 3.73 (s, 3H, -CH<sub>3</sub>), 4.02 (s, 2H, -NH<sub>2</sub>), 6.37 (s, 1H, =CH). <sup>13</sup>C NMR (125.6 MHz, CD<sub>3</sub>CN): δ 30.67 (CH<sub>3</sub>), 35.51 (CH<sub>3</sub>), 104.57 (=CH), 138.20 (=CNH<sub>2</sub>). <sup>11</sup>B NMR (128.2 MHz, CD<sub>3</sub>CN): δ 0.27 (q, J<sub>B-F</sub> = 37.2 Hz). <sup>19</sup>F NMR (375.9 MHz, CD<sub>3</sub>CN): δ -138.0 (q, J<sub>B-F</sub> = 37.2 Hz). HRMS (ESI<sup>-</sup>) calcd for [M-H]<sup>-</sup>: 178.0763, found: 178.0758.

### Preparation of 1, 3-dimethyl-4-maleic acid-imidazolium-2-trifluoroborate (6)

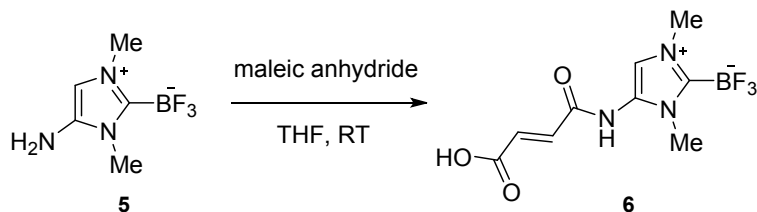

Maleic anhydride (0.172 g, 1.76 mmol) was added to a solution of **5** (0.1572g, 0.88 mmol) in THF (8 mL). The reaction mixture was stirred for 20 h at room temperature resulting in a white precipitate. The powder was collected by filtration and then dried in *vacuo* yielding **6** (0.180 g) in a 74 % yield.  $^1\text{H}$  NMR (399.5 MHz,  $\text{D}_2\text{O}$ ):  $\delta$  3.46 (s, 3H,  $-\text{CH}_3$ ), 3.61 (s, 3H,  $-\text{CH}_3$ ), 6.22 (d, 1H,  $=\text{CH}(\text{CO})$ ), 6.39 (d, 1H,  $=\text{CH}(\text{CO})$ ), 7.08 (s, 1H,  $=\text{CH}$ ).  $^{13}\text{C}$  NMR (125.6 MHz,  $\text{CD}_3\text{CN}$ ):  $\delta$  31.64 ( $\text{CH}_3$ ), 35.96 ( $\text{CH}_3$ ), 116.92 ( $=\text{CH}$ ), 126.56 ( $=\text{CN}(\text{CO})(\text{CH}=\text{CH})\text{COOH}$ ), 129.99 ( $-\text{HC}=\text{CH}-$ ), 131.67 ( $-\text{HC}=\text{CH}-$ ), 167.35 ( $\text{C}=\text{O}$ ), 168.71 ( $\text{C}=\text{O}$ ).  $^{11}\text{B}$  NMR (128.2 MHz,  $\text{D}_2\text{O}$ ):  $\delta$  -0.30 (q,  $J_{\text{B-F}} = 40.0$  Hz).  $^{19}\text{F}$  NMR (469.9 MHz,  $\text{D}_2\text{O}$ ):  $\delta$  -137.4 (q,  $J_{\text{B-F}} = 40.0$  Hz). HRMS (ESI $^-$ ) calcd for  $[\text{M-H}]^-$ : 276.0767, found: 276.0748.

### Preparation of 1, 3-dimethyl-4-maleimide-imidazolium-2-trifluoroborate (7)

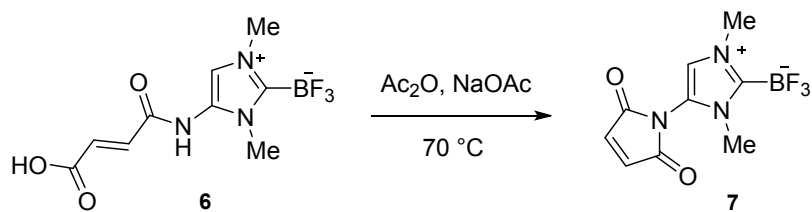

A solution of **6** (0.131 g, 0.47 mmol) and sodium acetate (NaOAc) (0.064 g, 0.47 mmol) in acetic anhydride ( $\text{Ac}_2\text{O}$ ) (15 mL) was heated to  $70^\circ\text{C}$  for 3 h. After 3 h, the acetic anhydride was removed in vacuum. The crude product was re-dissolved in  $\text{CH}_2\text{Cl}_2$  (30 mL) and then, the solution was washed with water (3x30 mL). The organic layer was dried with  $\text{MgSO}_4$ . Finally, the solvent was removed in vacuum yielding **7** (0.088 g) as a white powder in a 72 % yield.  $^1\text{H}$  NMR (499.4 MHz,  $\text{CD}_3\text{CN}$ ):  $\delta$  3.65 (s, 3H,  $-\text{CH}_3$ ), 3.91 (s, 3H,  $-\text{CH}_3$ ), 7.08 (s, 2H, maleimide= $\text{CH}$ ), 7.30 (s, 1H,  $=\text{CH}$ ).  $^{13}\text{C}$  NMR (125.6 MHz,  $\text{CD}_3\text{CN}$ ):  $\delta$  32.36 ( $\text{CH}_3$ ), 36.70 ( $\text{CH}_3$ ), 121.33 ( $=\text{CH}$ ), 121.52 ( $=\text{CN}(\text{C}(\text{O})\text{CH}_2)_2$ ), 135.86 (maleimide= $\text{CH}$ ), 168.75 ( $\text{C}=\text{O}$ ).  $^{11}\text{B}$  NMR (128.2 MHz,  $\text{CD}_3\text{CN}$ ):  $\delta$  0.29 (q,  $J_{\text{B-F}} = 35.6$  Hz).  $^{19}\text{F}$  NMR (375.9 MHz,  $\text{CD}_3\text{CN}$ ):  $\delta$  -138.5 (q,  $J_{\text{B-F}} = 35.6$  Hz). HRMS (ESI $^-$ ) calcd for  $[\text{M}+\text{Na}]^+$ : 282.0638, found: 282.0650.

## Crystallographic Measurements

Single crystals of **2** were obtained by slow diffusion of Et<sub>2</sub>O into a CH<sub>3</sub>CN solution of **2**. Single crystals of **4** and **7** were obtained by slow diffusion of pentane into a THF solution of **4** and **7**, respectively. The crystallographic measurement of **2**, **4**, and **7** were performed using a Bruker APEX-II CCD area detector diffractometer, with graphite-monochromated Mo-K<sub>α</sub> radiation ( $\lambda = 0.71069 \text{ \AA}$ ). A specimen of suitable size and quality was selected and mounted onto a nylon loop. The semi-empirical method SADABS was applied for absorption correction. The structure was solved by direct methods, and refined by the full-matrix least-square method against  $F^2$  with the anisotropic temperature parameters for all non-hydrogen atoms. All H atoms were geometrically placed and refined using the riding model approximations. Data reduction and further calculations were performed using the Bruker SAINT+ and SHELXTL NT program packages. CCDC: 1402916–1402918 contains the supplementary crystallographic data for this paper and can be accessed free of charge from The Cambridge Crystallographic Data Centre via [www.ccdc.cam.ac.uk/data\\_request/cif](http://www.ccdc.cam.ac.uk/data_request/cif).

**Figure S1.**  $^1\text{H}$ ,  $^{13}\text{C}$ ,  $^{11}\text{B}$ , and  $^{19}\text{F}$  NMR spectra of **2** in  $\text{CD}_3\text{CN}$ .

**$^1\text{H}$  NMR**

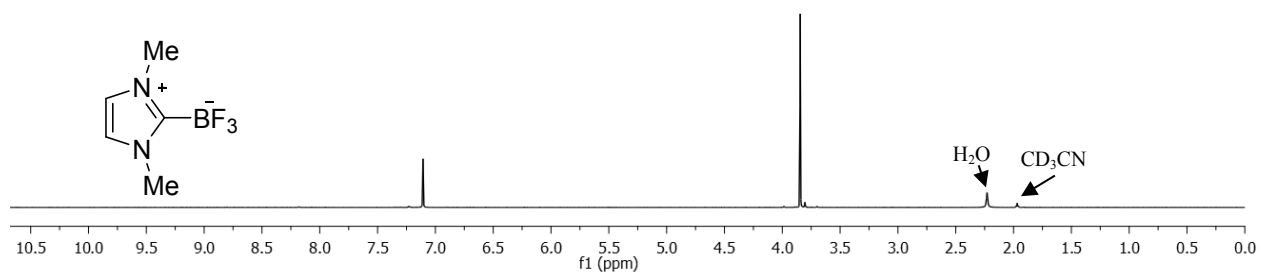

**$^{13}\text{C}$  NMR**

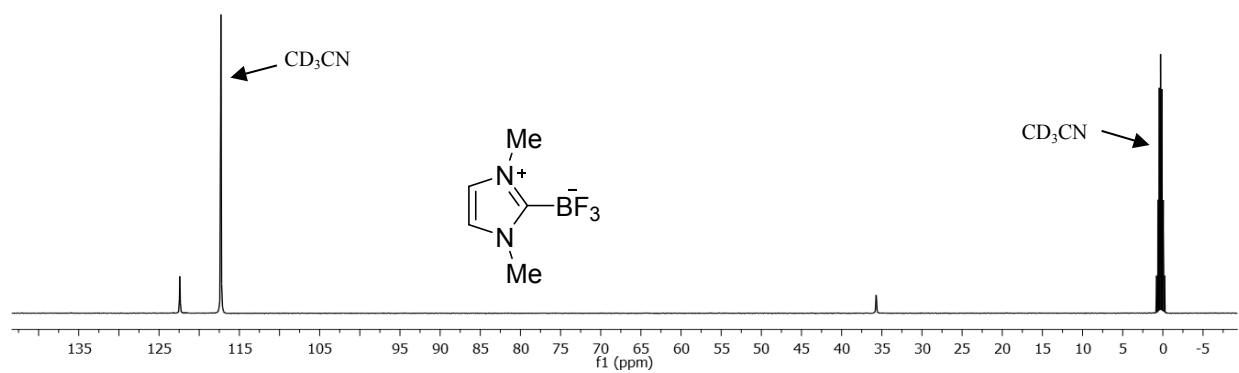

**$^{11}\text{B}$  NMR**

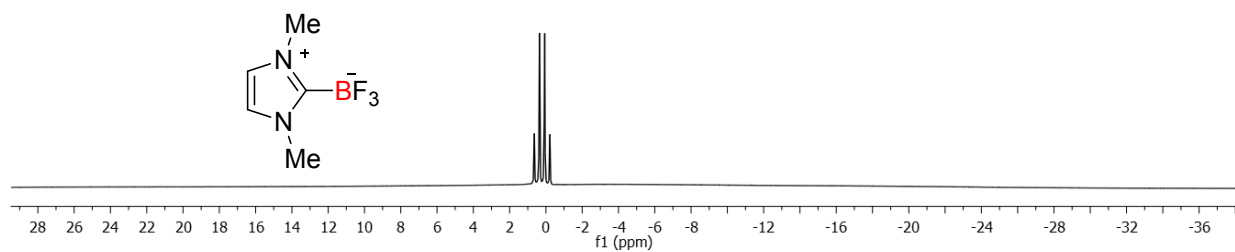

**$^{19}\text{F}$  NMR**

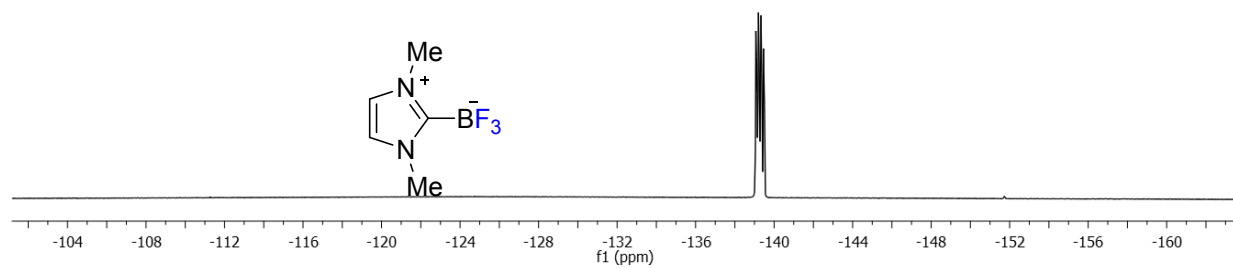

**Figure S2.**  $^1\text{H}$ ,  $^{13}\text{C}$ ,  $^{11}\text{B}$ , and  $^{19}\text{F}$  NMR spectra of **4** in  $\text{CD}_3\text{CN}$ .

**$^1\text{H}$  NMR**

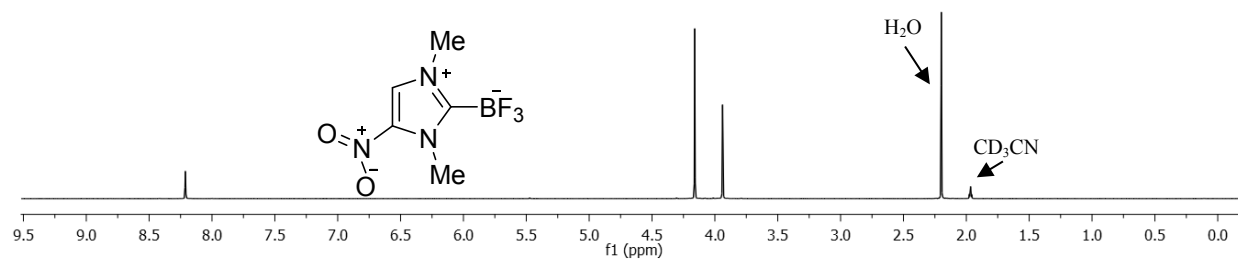

**$^{13}\text{C}$  NMR**

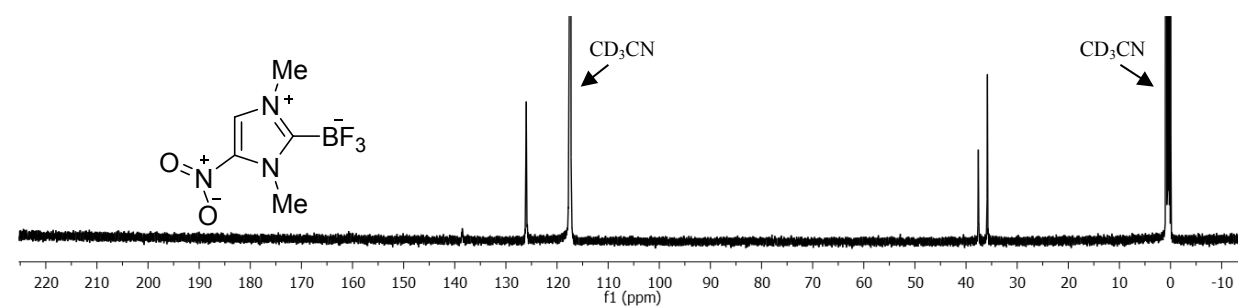

**$^{11}\text{B}$  NMR**

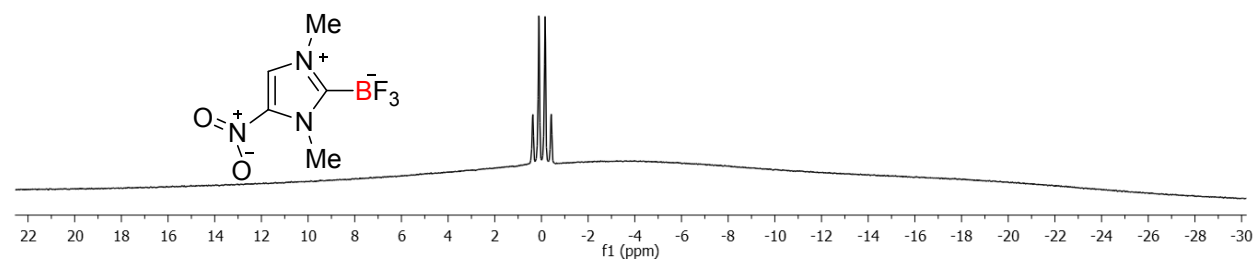

**$^{19}\text{F}$  NMR**

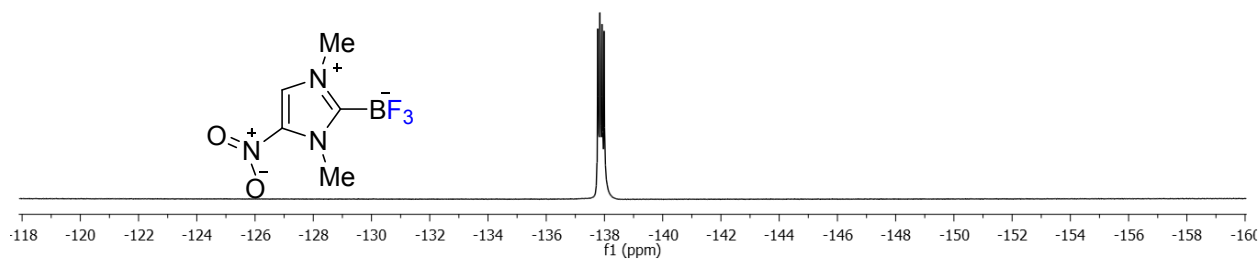

**Figure S3.**  $^1\text{H}$ ,  $^{13}\text{C}$ ,  $^{11}\text{B}$ , and  $^{19}\text{F}$  NMR spectra of **5** in  $\text{CD}_3\text{CN}$ .

**$^1\text{H}$  NMR**

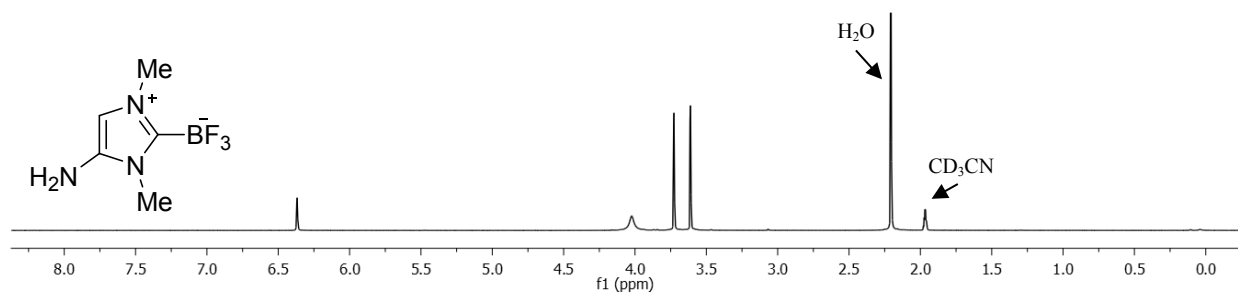

**$^{13}\text{C}$  NMR**

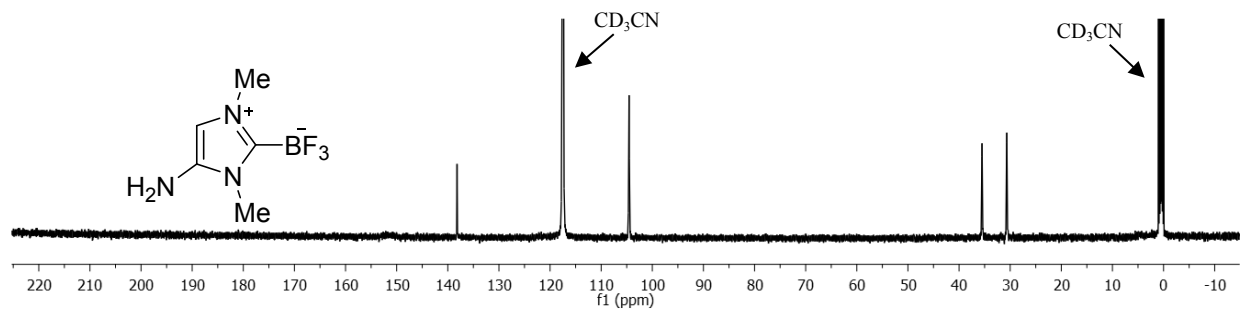

**$^{11}\text{B}$  NMR**

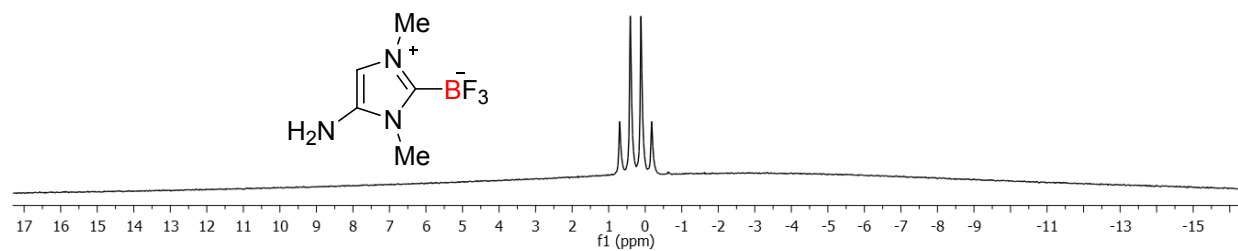

**$^{19}\text{F}$  NMR**

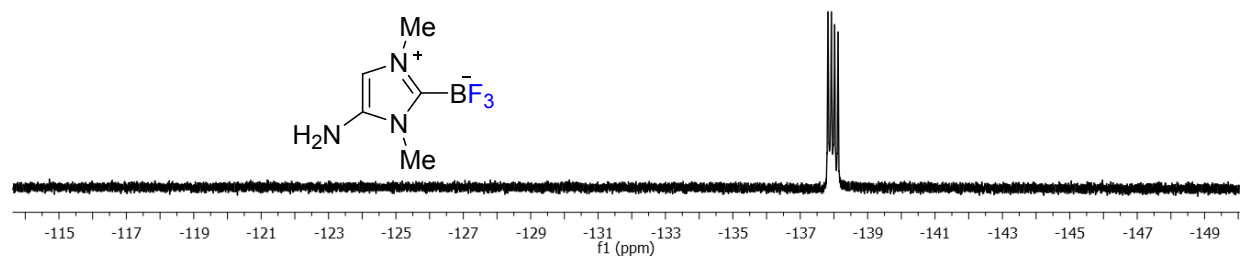

**Figure S4.**  $^1\text{H}$ ,  $^{13}\text{C}$ ,  $^{11}\text{B}$ , and  $^{19}\text{F}$  NMR spectra of **6** in  $\text{D}_2\text{O}$ .

**$^1\text{H}$  NMR**

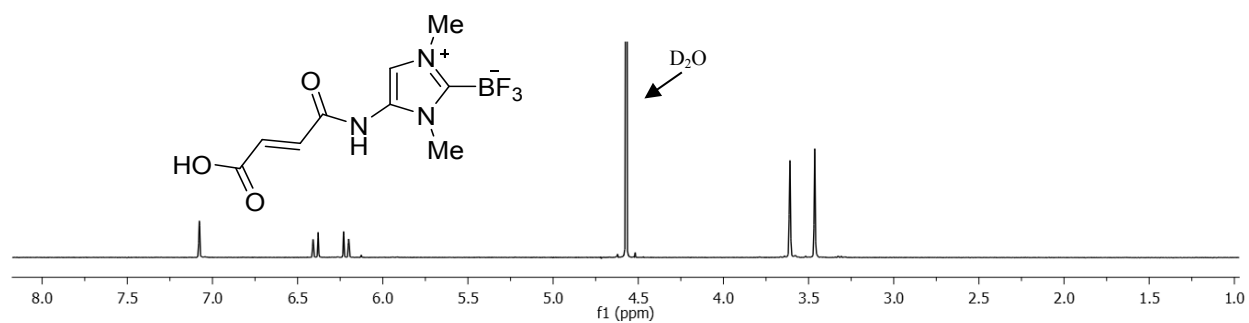

**$^{13}\text{C}$  NMR**

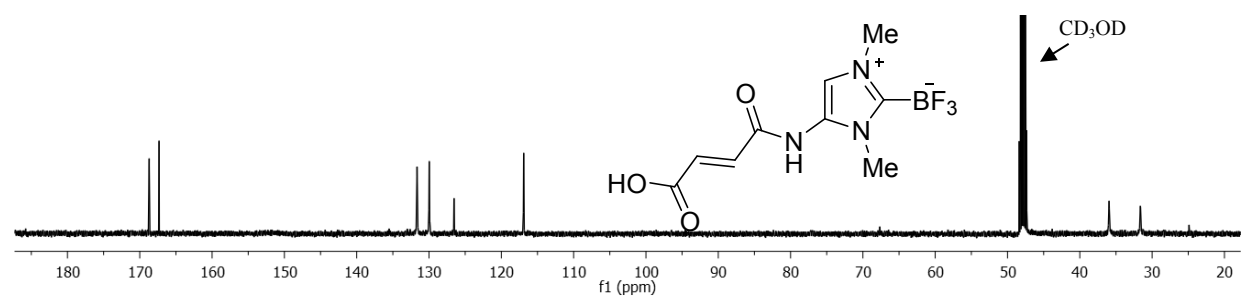

**$^{11}\text{B}$  NMR**

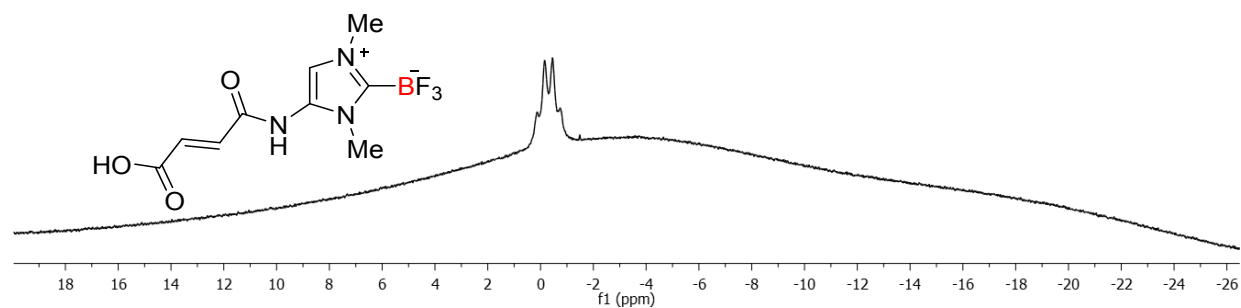

**$^{19}\text{F}$  NMR**

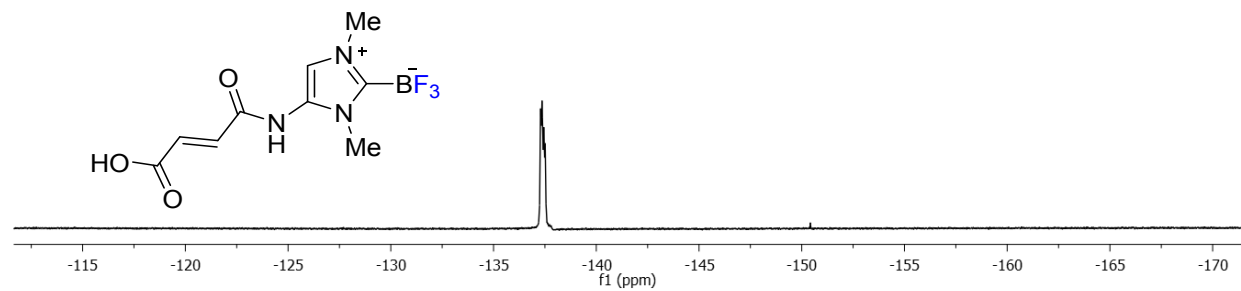



**Figure S5.**  $^1\text{H}$ ,  $^{13}\text{C}$ ,  $^{11}\text{B}$ , and  $^{19}\text{F}$  NMR spectra of **7** in  $\text{CD}_3\text{CN}$ .

**$^1\text{H}$  NMR**

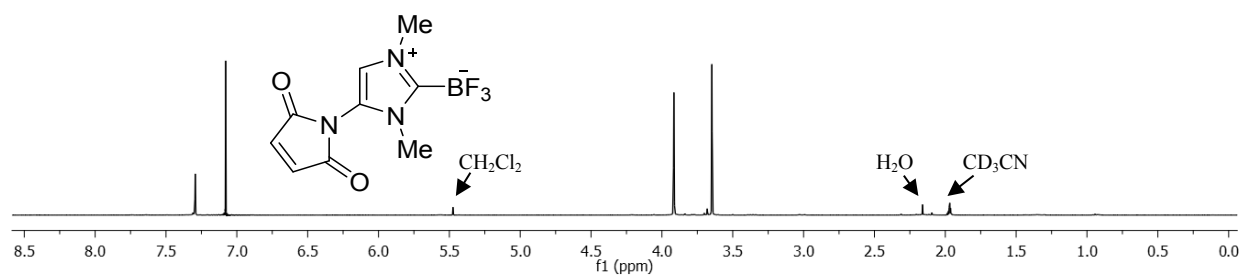

**$^{13}\text{C}$  NMR**

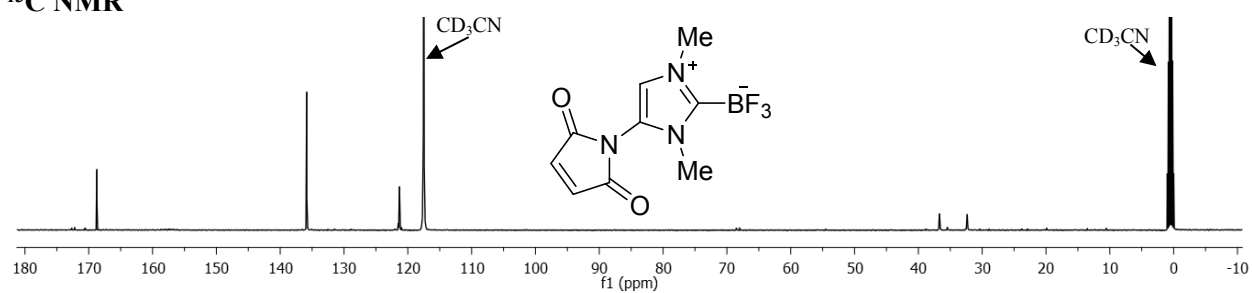

**$^{11}\text{B}$  NMR**

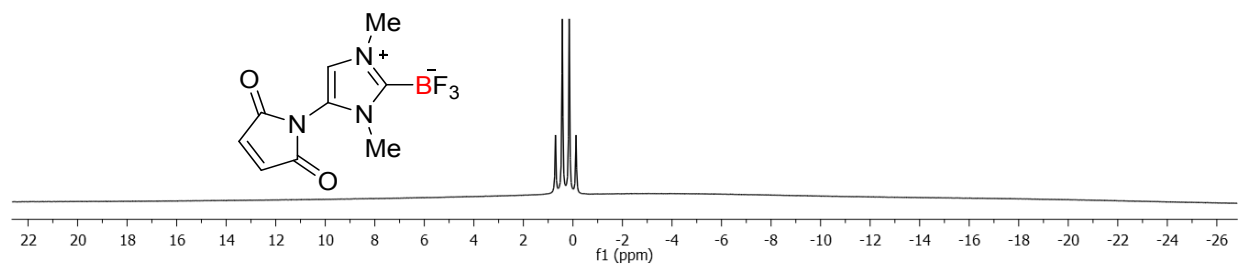

**$^{19}\text{F}$  NMR**

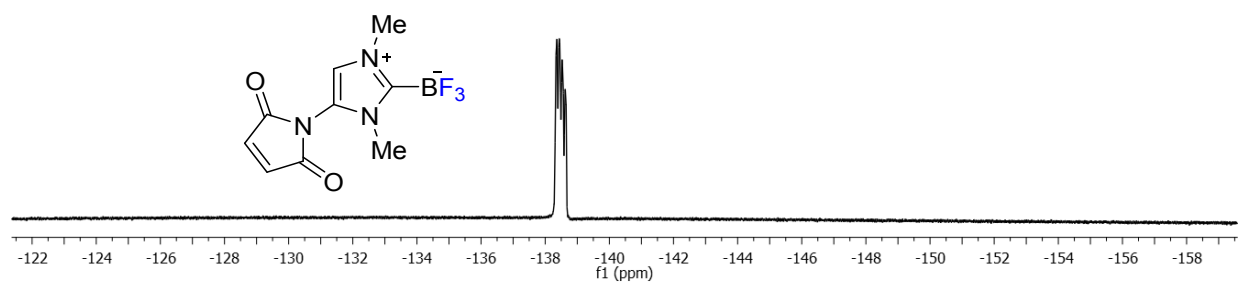

**Figure S6.** High resolution mass spectrum of **2**

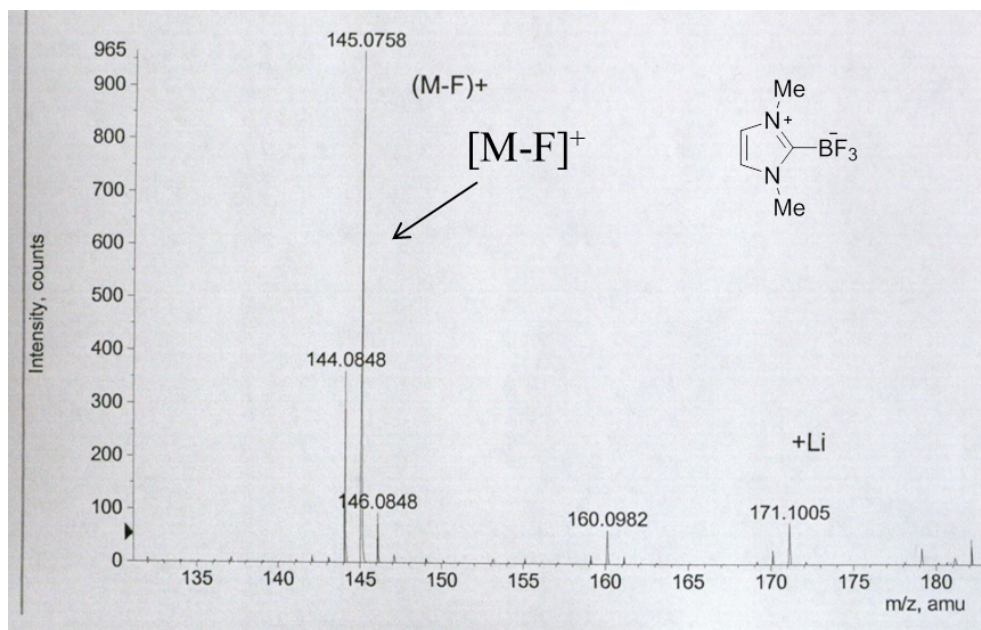

**Figure S7.** High resolution mass spectrum of **4**

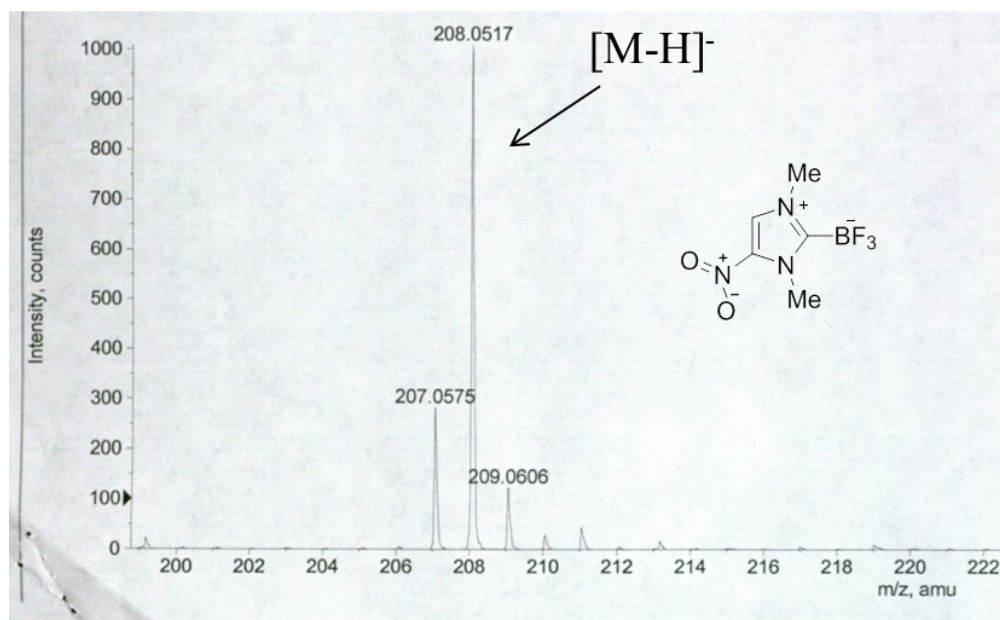

**Figure S8.** High resolution mass spectrum of **5**

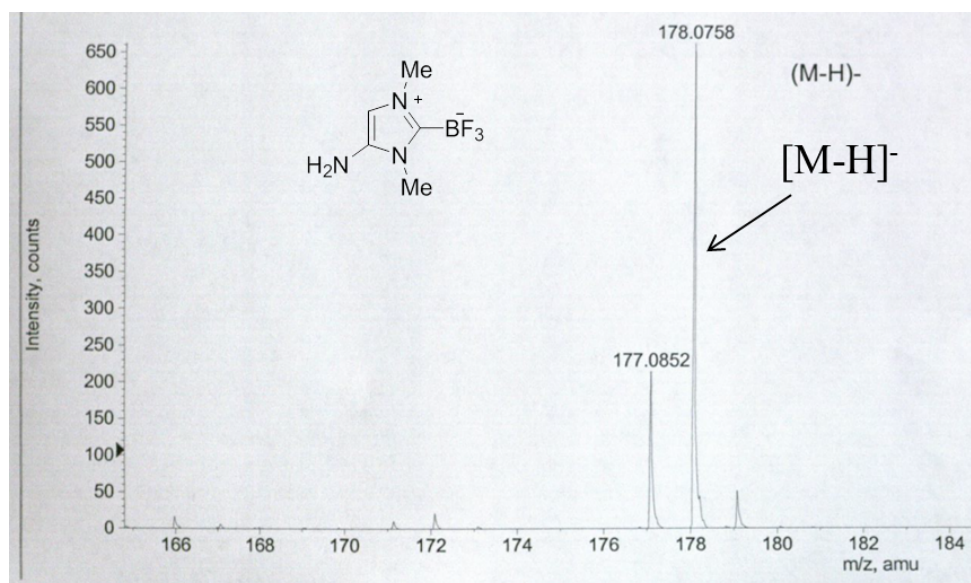

**Figure S9.** High resolution mass spectrum of **6**

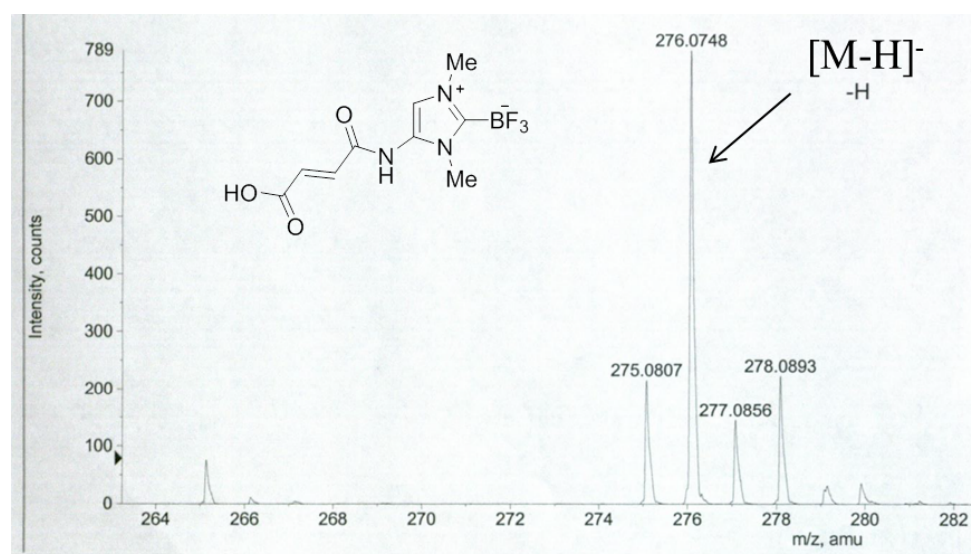

**Figure S10.** High resolution mass spectrum of **7**

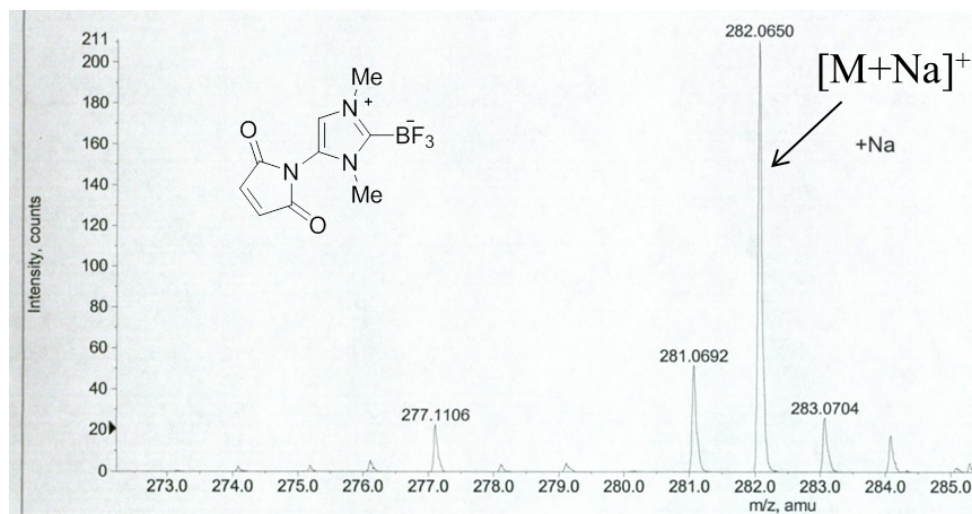

### Kinetic studies of the hydrolysis reactions

A sample of **2**, **4**, **5**, and **7** (5 mg) was dissolved in 0.2 mL  $CD_3CN$  and 0.8 mL  $D_2O$  phosphate buffer (pH 7.5, 500 mM). The  $^{19}F$  NMR spectra of **2**, **4**, **5**, and **7** were collected periodically. The decomposition of aryltrifluoroborate species were monitored by integration of the decreasing aryltrifluoroborate signal in conjunction with the increasing signal corresponding to free  $F^-$ . All spectra were processed using the VNMRJ Version 2.2 NMR software. The rate constant,  $k_{obs}$ , was calculated using a well-established NMR method reported in the literature.<sup>3</sup> This method is based on the fact that the concentration in  $ArBF_3$  species is proportional to the  $^{19}F$  NMR integration of  $ArBF_3$  signal divided by the sum of the integration of  $ArBF_3$  signal and the free fluoride signal. For convenience, the value of the  $ArBF_3$  integration is arbitrarily set at 100 and the free fluoride integration determined. Based on the  $^{19}F$  NMR results, free  $F^-$  NMR signal was only observed in the aqueous solution of **2**, and **5** after a week. The resulting data is provided in Table S1 and S2.

**Table S1:** Kinetic data for the hydrolysis of **2**. The values provided for F<sup>-</sup> and ArBF<sub>3</sub> correspond to the integration of the corresponding NMR signal.

|            | Data for <b>2</b> |                    |                                              |                                              |
|------------|-------------------|--------------------|----------------------------------------------|----------------------------------------------|
|            |                   |                    |                                              | k= 1.2E-6                                    |
|            |                   |                    | exp. Ratio                                   | calc. ratio                                  |
| Time (min) | [F]               | [BF <sub>3</sub> ] | [BF <sub>3</sub> ]/([BF <sub>3</sub> ]+[HF]) | [BF <sub>3</sub> ]/([BF <sub>3</sub> ]+[HF]) |
| 0          | 0.00              | 100                | 1.0000                                       | 1.0000                                       |
| 1141       | 0.34              | 100                | 0.9966                                       | 0.9986                                       |
| 2594       | 0.41              | 100                | 0.9959                                       | 0.9969                                       |
| 4152       | 0.48              | 100                | 0.9953                                       | 0.9950                                       |
| 9776       | 0.76              | 100                | 0.9925                                       | 0.9882                                       |
| 11000      |                   |                    |                                              | 0.9867                                       |
| 12000      |                   |                    |                                              | 0.9855                                       |
| 13000      |                   |                    |                                              | 0.9843                                       |
| 14000      |                   |                    |                                              | 0.9831                                       |
| 15000      |                   |                    |                                              | 0.9820                                       |

**Table S2:** Kinetic data for the hydrolysis of **5**. The values provided for F<sup>-</sup> and ArBF<sub>3</sub> correspond to the integration of the corresponding NMR signal.

|            | Data for <b>5</b> |                    |                                              |                                              |
|------------|-------------------|--------------------|----------------------------------------------|----------------------------------------------|
|            |                   |                    |                                              | k= 1.1E-6                                    |
|            |                   |                    | exp. Ratio                                   | calc. ratio                                  |
| Time (min) | [F]               | [BF <sub>3</sub> ] | [BF <sub>3</sub> ]/([BF <sub>3</sub> ]+[HF]) | [BF <sub>3</sub> ]/([BF <sub>3</sub> ]+[HF]) |
| 0          | 0.00              | 100                | 1.0000                                       | 1.0000                                       |
| 1434       | 0.20              | 100                | 0.9980                                       | 0.9984                                       |
| 2884       | 0.31              | 100                | 0.9970                                       | 0.9968                                       |
| 4563       | 0.49              | 100                | 0.9952                                       | 0.9950                                       |
| 10126      | 0.91              | 100                | 0.9910                                       | 0.9889                                       |
| 11000      |                   |                    |                                              | 0.9880                                       |
| 12000      |                   |                    |                                              | 0.9869                                       |
| 13000      |                   |                    |                                              | 0.9858                                       |
| 14000      |                   |                    |                                              | 0.9847                                       |
| 15000      |                   |                    |                                              | 0.9837                                       |

## Radiochemistry Experiment

All chemicals were purchased in analytical grade and used without further purification. Analytical reversed-phase HPLC using a Gemini 5 $\mu$  C18 column (250 x 4.6mm) was performed on a SPD-M30A photodiode array detector (Shimadzu) and model 105S single-channel radiation detector (Carroll & Ramsey Associates). The flow was set to 1mL/min. The mobile phase stayed at 95% solvent A and 5% solvent B from 0-2min and then changed with a gradient from 95% solvent A 5% solvent B to 95% solvent B and 5% solvent A in 20min. Solvent A is 0.1% TFA in water and solvent B is 0.1% TFA in acetonitrile.

## Radiochemistry

The radiolabeling reactions were carried out using the following protocol unless otherwise specified. Compound **2** or **7** (1.2  $\mu$ mol) was mixed with SnCl<sub>4</sub> (5 eq) in MeCN (10  $\mu$ L). The resulting solution was then combined with a MeCN solution (30  $\mu$ L) of [<sup>18</sup>F]fluoride. After shaking at 60°C for 10 min, the reaction was quenched by adding 200  $\mu$ L of water. The mixture passed through a Sep-Pak cartridge (Sep-Pak Plus tC18) and washed with 3 mL water. The radiofluorinated derivatives [<sup>18</sup>F]**2** or [<sup>18</sup>F]**7** was eluted off the cartridge with 1mL MeCN and an aliquot of the MeCN fraction (30  $\mu$ Ci) was used for HPLC analysis. The results are compiled in Tables S3 and S4.

For [<sup>18</sup>F]**7**, the pH of the solution collected after HPLC purification was adjusted to 7 by addition of 0.1N NaOH. The resulting solution was then mixed with an aqueous solution of H-Cys-Phe-OH (400  $\mu$ g, 1.5 $\mu$ mol). After shaking for 10 min at room temperature, a portion of the reaction mixture (0.01mCi) was loaded onto HPLC for further analysis and purification. The HPLC containing [<sup>18</sup>F]**7**-H-Cys-Phe-OH was collected. The HPLC eluent was removed using a rotary evaporator. [<sup>18</sup>F]**7**-H-Cys-Phe-OH was reconstituted in 1x PBS for stability test and small animal study.

## In Vitro Stability

[<sup>18</sup>F]**7**-H-Cys-Phe-OH was incubated in 1x PBS buffer at 37 °C. An aliquot of the solution (10  $\mu$ Ci) was taken out and loaded on HPLC at 0.5h, 1h and 2h time point for analysis (Figure S14).

## Small animal PET Imaging

Animal procedures were performed according to a protocol approved by the UNC institutional Animal Care and Use Committee. PET scans were performed using a small animal PET/CT scanner (Vista eXplore, GE Healthcare, Inc) with a center resolution of 1.2- and 4.6-mm axial field of view. A CT scan was first acquired for subsequent attenuation correction and anatomic registration. A normal nude mouse was anesthetized using 2% isoflurane and injected with 3.1 MBq (86  $\mu$ Ci) of [<sup>18</sup>F]**7**-H-Cys-Phe-OH via tail vein. At 1, 2, and 4h post injection, static emission scans were acquired for 10-20 min. Raw PET images were reconstructed using 2D ordered subset expectation maximization (OSEM) algorithms with scatter, random and attenuation correction.

**Table S3:** radiosynthetic results for [<sup>18</sup>F]**2**

| Pre Sep-Pak purification |                         |                      |                  |                        |           |            | Post Sep-Pak purification |                |                      | Post HPLC            |                |
|--------------------------|-------------------------|----------------------|------------------|------------------------|-----------|------------|---------------------------|----------------|----------------------|----------------------|----------------|
| Entry                    | Starting activity (mCi) | Amount of [2] (μmol) | MeCN Volume (μL) | SnCl <sub>4</sub> (eq) | Temp (°C) | Time (min) | Amount of [2] (μmol)      | Activity (mCi) | solution volume (mL) | Amount of [2] (μmol) | Activity (mCi) |
| 1                        | 37.2                    | 0.6                  | 40               | 5                      | 25        | 10         | 0.5                       | 14.4           | 1                    | 0.5                  | 13.2           |
| 2                        | 77.2                    | 1.2                  | 40               | 5                      | 25        | 10         | 0.8                       | 35.5           | 1                    | 0.8                  | 32.5           |
| 3                        | 34.5                    | 2.4                  | 40               | 5                      | 25        | 10         | 0.4                       | 17.4           | 1                    | 0.4                  | 16.3           |
| 4                        | 39.3                    | 1.2                  | 40               | 10                     | 25        | 10         | 0.4                       | 20.5           | 1                    | 0.4                  | 19.0           |
| 5                        | 39.7                    | 1.2                  | 40               | 15                     | 25        | 10         | 0.4                       | 20.0           | 1                    | 0.4                  | 19.1           |
| 6                        | 48.4                    | 1.2                  | 40               | 5                      | 40        | 10         | 0.6                       | 29.5           | 1                    | 0.6                  | 27.3           |
| 7                        | 37.1                    | 1.2                  | 40               | 5                      | 60        | 10         | 0.4                       | 21.3           | 1                    | 0.4                  | 19.8           |
| 8                        | 42.9                    | 1.2                  | 40               | 5                      | 25        | 20         | 0.4                       | 23.1           | 1                    | 0.4                  | 21.4           |
| 9                        | 55.4                    | 1.2                  | 40               | 5                      | 25        | 30         | 0.6                       | 23.1           | 1                    | 0.6                  | 22.1           |

**Table S4:** radiosynthetic results for [<sup>18</sup>F]**7**

| Pre Sep-Pak purification |                         |                      |                  |                        |           |            | Post Sep-Pak purification |                |                      | Post HPLC            |                |
|--------------------------|-------------------------|----------------------|------------------|------------------------|-----------|------------|---------------------------|----------------|----------------------|----------------------|----------------|
| Entry                    | Starting activity (mCi) | Amount of [7] (μmol) | MeCN Volume (μL) | SnCl <sub>4</sub> (eq) | Temp (°C) | Time (min) | Amount of [7] (μmol)      | Activity (mCi) | solution volume (mL) | Amount of [7] (μmol) | Activity (mCi) |
| 1                        | 38                      | 1.2                  | 40               | 5                      | 60        | 10         | 0.4                       | 21.9           | 1                    | 0.4                  | 20.5           |

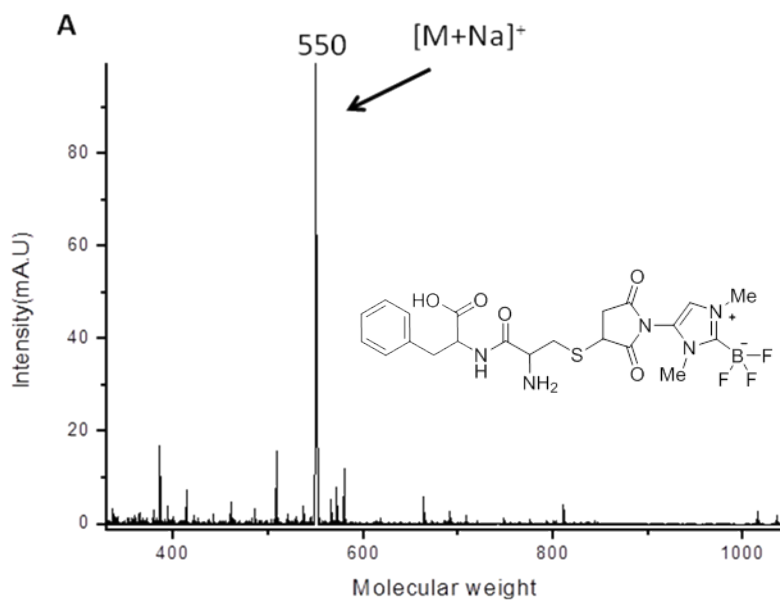

**Figure S11.** Mass spectrum of 7-H-Cys-Phe-OH

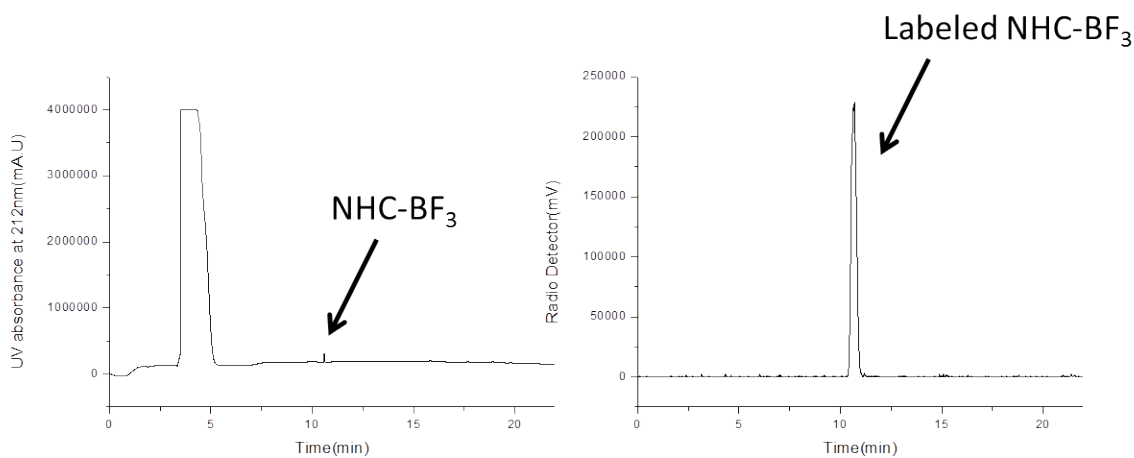

**Figure S12.** HPLC profiles obtained in the radiofluorination of **2**.  
(left) UV signal. (right) Radio signal



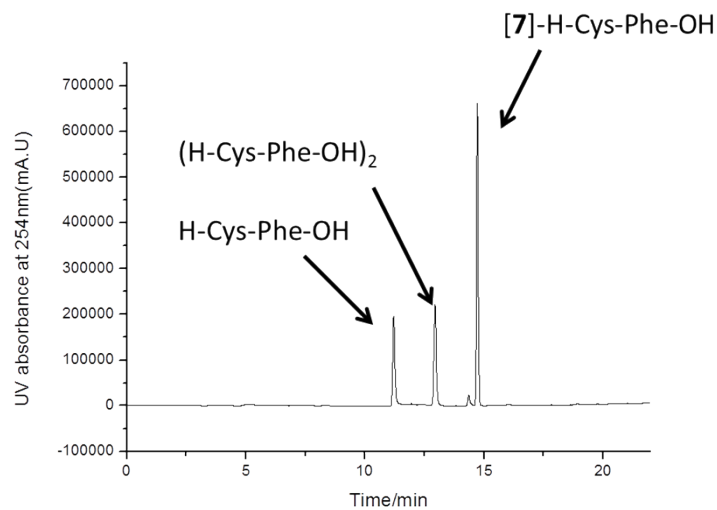

**Figure S13.** Crude UV-HPLC profile for the  $^{18}\text{F}$ -labeling of  $\text{BF}_3$ -carbene-Cys-Phe

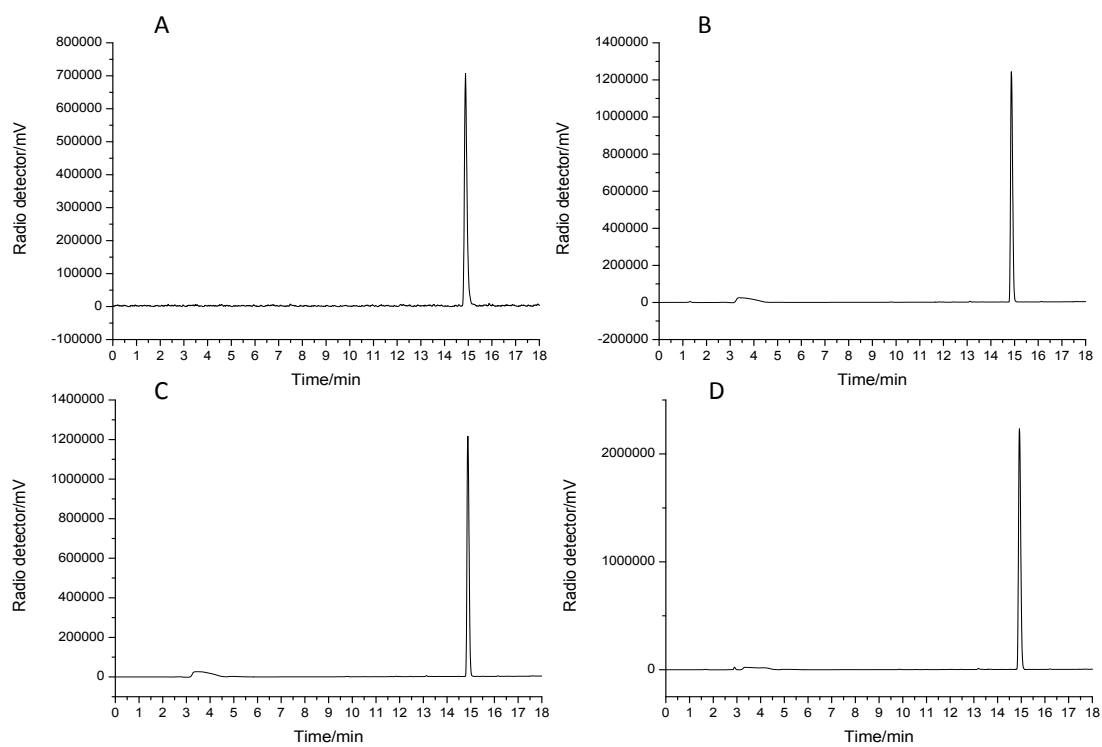

**Fig. S14.** A:  $[^{18}\text{F}]7$  standard Radio-HPLC profile. B,C,D:  $[^{18}\text{F}]7$  in 1x PBS for 0.5h, 1h and 2h with purity of 96.6%, 93.9%, and 92.5%, respectively.

## References

1. I. Tommasi, F. Sorrentino, *Tetrahedron Lett* 2005, **46**, 2141-2145.
2. D. M. Khramov, V. M. Lynch, C. W. Bielawski, *Organometallics* 2007, **26**, 6042-6049.
3. R. Ting, C. W. Harwig, J. Lo, Y. Li, M. J. Adam, T. J. Ruth, D. M. Perrin, *J Org Chem* 2008, **73**, 4662-4670.
